# Supplementary material for: Cobalt distribution in the Boleo stratiform sediment-hosted ore deposit: a transtension rift basin in the central Baja California peninsula, Mexico
Source: Copernicus journal article supplement (doi:10.5194/egusphere-2023-607), 2023-04-12
Supplement: Supplementary file [file egusphere-2023-607-RC1-supplement.pdf]

Pr. Zaineb HAJJAR

Comment on the manuscript:

« COBALT DISTRIBUTION IN THE BOLEO STRATIFORM SEDIMENT-HOSTED ORE  
DEPOSIT; A TRANSTENSION RIFT BASIN IN CENTRAL BAJA CALIFORNIA  
PENINSULA, MEXICO. »

Submitted by:

Valente O. Salgado Muñoz, Tina M. Niemi James B. Murowchick, Alyssa Troia,

Anna Turi Maher, Aldo Javier Jaime-Geraldo

to

The EGU interactive community platform

---

I revised the manuscript entitled: “Cobalt Distribution in the Boleo Stratiform Sediment-Hosted Ore Deposit; A Transtension Rift Basin in Central Baja California Peninsula, Mexico”.

The manuscript is an interesting contribution to the understanding of the distribution of Cobalt in the Boleo copper deposit (in Central Baja California Peninsula, Mexico).

In addition, to cobalt distribution mapping, this article extends the distribution of gypsum in the Santa Rosalia Basin to the surface and subsurface. In general, this article provides a valuable insight for further exploration and understanding of cobalt mineralization in similar geological settings.

The article is well written in English and structured, so the research work **can be accepted**.

Zaineb Hajjar
